# Supplementary material for: Pioneer Factor Improves CRISPR‐Based C‐To‐G and C‐To‐T Base Editing
Source: PubMed Central journal article supplement (PMC9475549; doi:10.1002/advs.202202957), 2022-07-21
Supplement: ADVS-9-2202957-s001.pdf [file ADVS-9-2202957-s001.pdf]

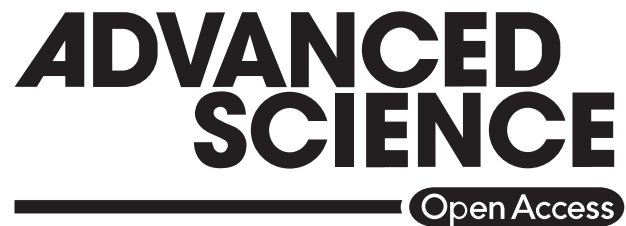

## Supporting Information

for *Adv. Sci.*, DOI 10.1002/adv.202202957

Pioneer Factor Improves CRISPR-Based C-To-G and C-To-T Base Editing

*Chao Yang, Xingxiao Dong, Zhenzhen Ma, Bo Li, Changhao Bi\* and Xueli Zhang\**

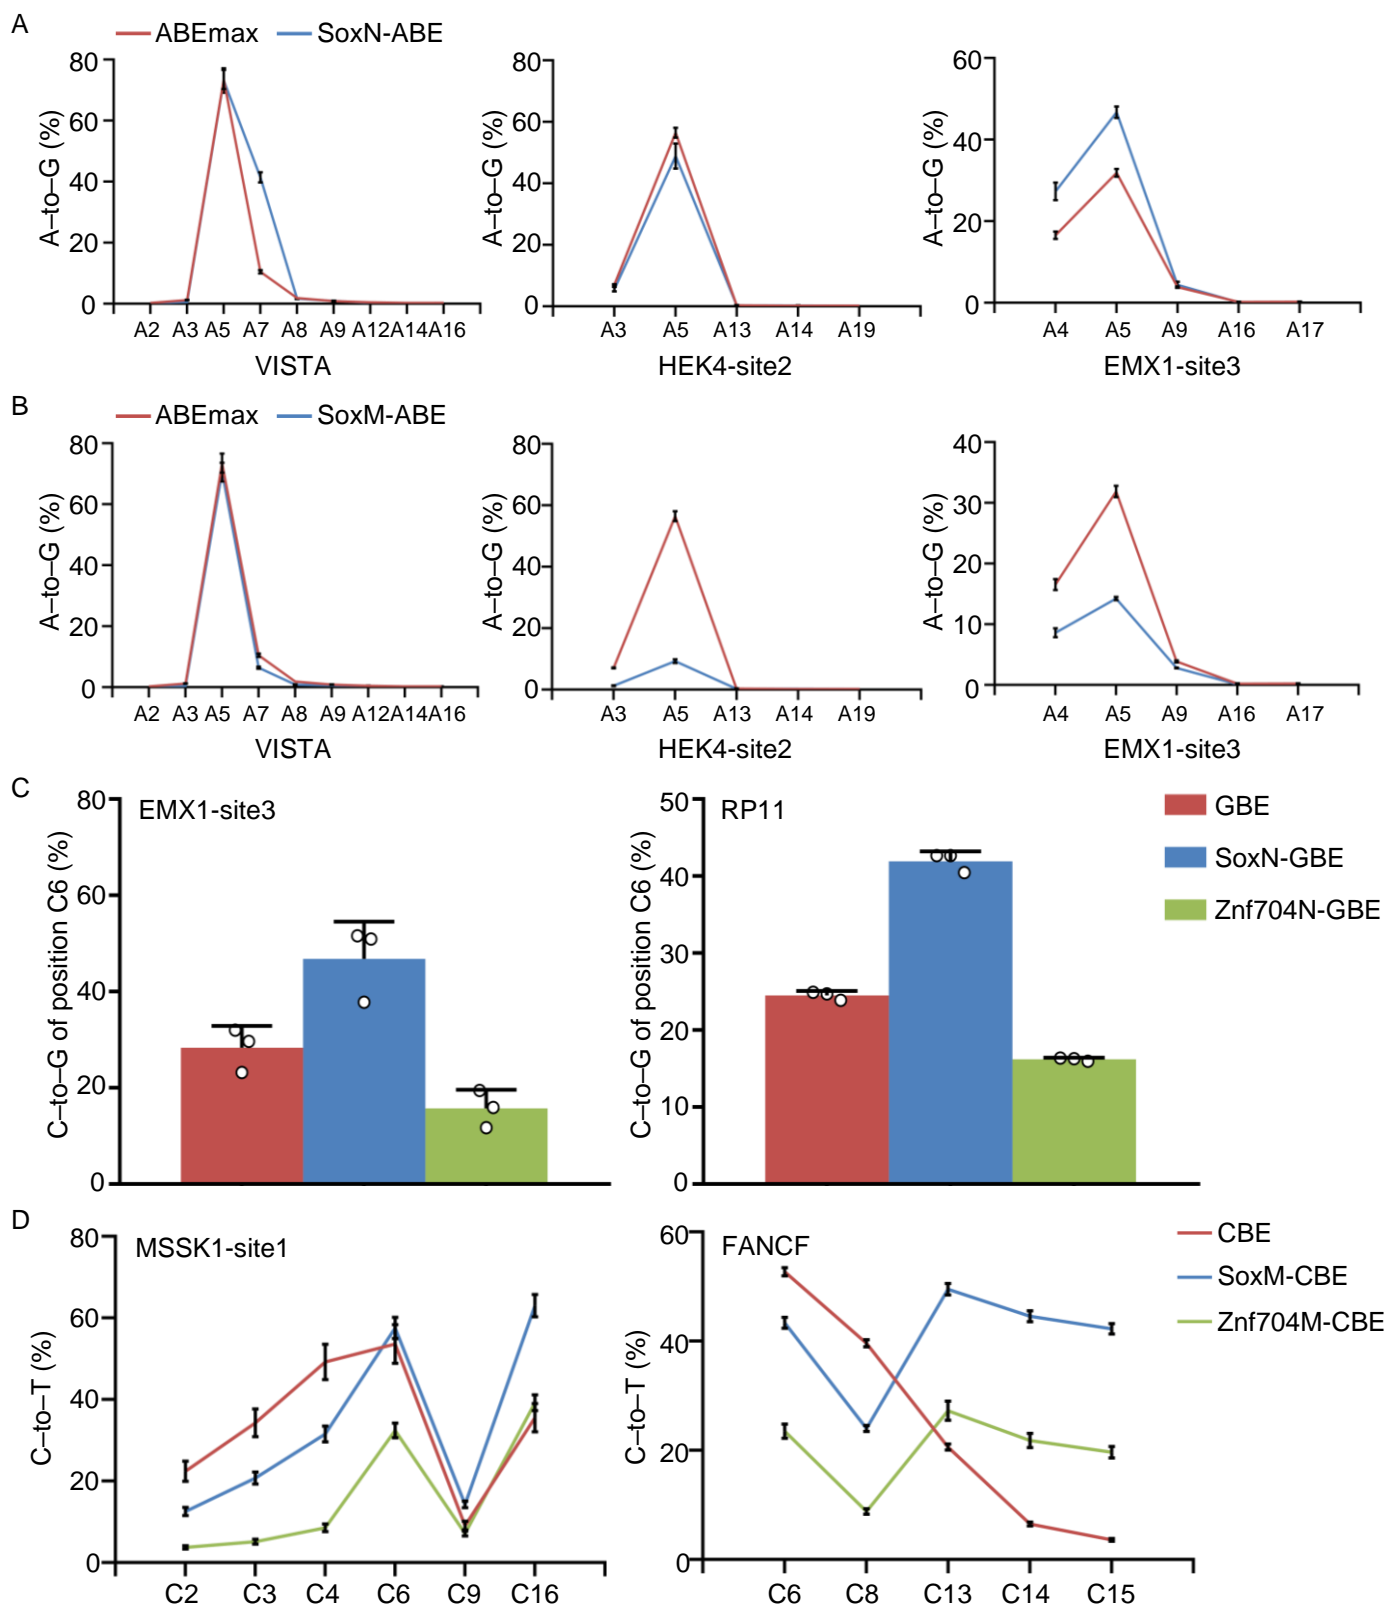

**Figure S1.** (A) Base editing efficiency of ABEmax and SoxN-ABE at VISTA, HEK4-site3 and EMX1-site3 in HEK293T cells. (B) Base editing efficiency of ABEmax and SoxM-ABE at VISTA, HEK4-site3 and EMX1-site3 in HEK293T cells. (C) Base editing efficiency of GBE, SoxN-GBE and Znf704N-GBE at EMX1-site3 and RP11 site in HEK293T cells. (D) Base editing efficiency of CBE, SoxM-CBE and Znf704M-CBE at MSSK1-site1 and FANCF site in HEK293T cells.

A

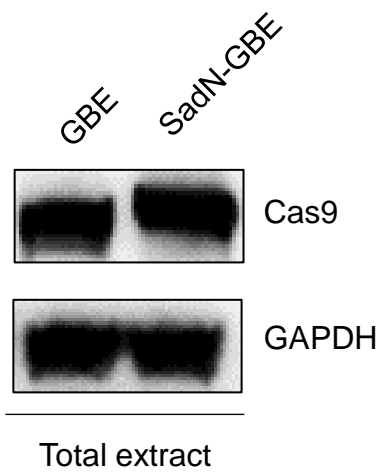

B

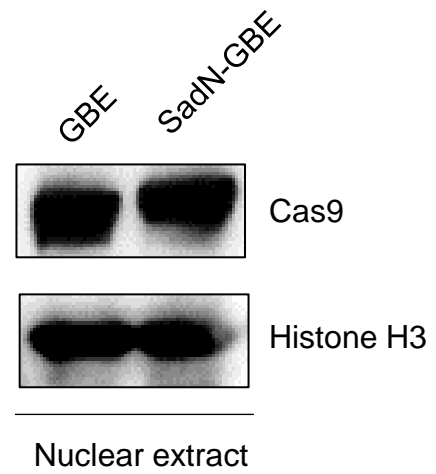

**Figure S2.** (A) Cas9 expression from HEK293T cell lysis between GBE and SadN-GBE. (B) Cas9 expression from HEK293T nuclear extract between GBE and SadN-GBE.

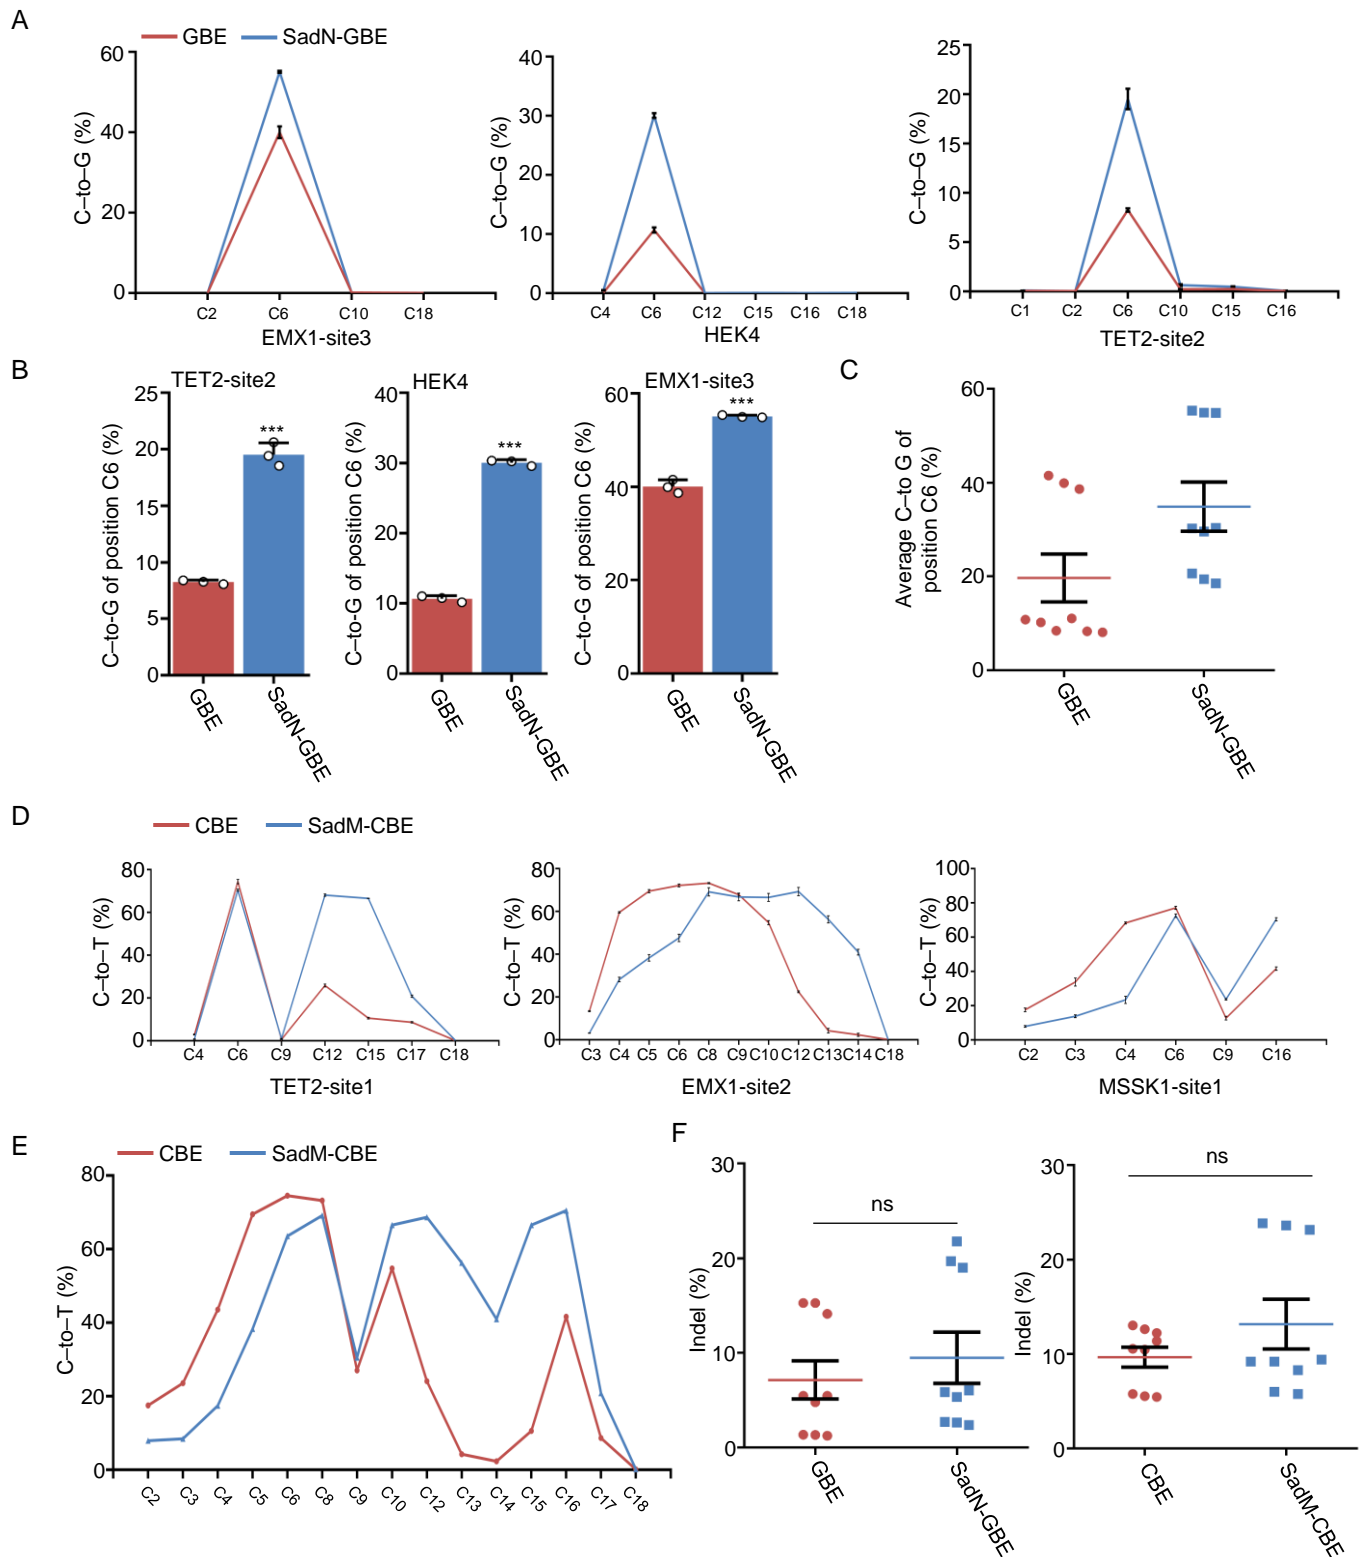

**Figure S3.** (A) Editing efficiency between GBE and SadN-GBE at three endogenous genomic loci in HeLa cells. (B) Efficiency at position C6 between GBE and SadN-GBE at three loci in HeLa cells. (C) Average C-to-G editing at position C6 at three targets edited by GBE and SadN-GBE in HeLa cells. (D) Efficiency among CBE and SadM-CBE at three endogenous genomic loci in HeLa cells. (E) Average editing efficiencies from three loci at C2-C18 of the protospacer by CBE and SadM-CBE. (F) The indel frequency across the protospacer of pioneer-BEs at three loci in HeLa cells. \*\*\* $P < 0.001$  (Student's t-test); ns, not significant (Student's t-test).

**Table S1: Cloning PCR oligos**

| <b>Protein</b> |          | <b>Clone oligo (5'-3')</b>   |
|----------------|----------|------------------------------|
| FOXA1          | Oligo-up | ATGTTAGGAACTGTGAAGATGGAAGGGC |
|                | Oligo-dn | GCTTCCTCCGCTACTTCCTCCGC      |
| SOX2           | Oligo-up | ATGTACAACATGATGGAGACGGAGC    |
|                | Oligo-dn | CATGTGTGAGAGGGGCAGTGTGC      |
| PBX1           | Oligo-up | ATGGACGAGCAGCCCAGGC          |
|                | Oligo-dn | GTTGGAGGTATCAGAGTGAACACTGCC  |
| PAX7           | Oligo-up | ATGGCGGCCCTTCCCAGGC          |
|                | Oligo-dn | GGTGAACCTGTTCCATCTGGCTGG     |
| ZNF704         | Oligo-up | ATGACCTTCACATTTTCAGTC        |
|                | Oligo-dn | GTCGAGGAACCTCTGGCA           |
| SOX2-HMG       | Oligo-up | CGCGTCAAGCGGCCCATGA          |
|                | Oligo-dn | CCGGTATTTATAATCCGGGTGCTCCT   |
| SOX2-RBD       | Oligo-up | AAGAAGGATAAGTACACGCTGC       |
|                | Oligo-dn | GTAGCCCAGCTGGTC              |
| SOX2-SAD       | Oligo-up | GACGTGAGCGCCCTGCAGTACAACCTCC |
|                | Oligo-dn | CATGTGTGAGAGGGGCAGTGTGCC     |

**Table S2-1: Clone oligos and deep sequencing oligos of sgRNA-Regular site**

| sgRNA       | Target site sequence (5'-3') |          | Deep sequencing oligo (5'-3') |
|-------------|------------------------------|----------|-------------------------------|
| APE1        | CCCCACAGAAAACACTACGGGC       | Oligo-up | GCCTGGATTAAGAAGAAAGGATTAG     |
|             |                              | Oligo-dn | GGAAGTGAAGGAACAGACATTTAG      |
| EMX1-site1  | GCTGGCATTACAAACCTGCC         | Oligo-up | AGAGAGAGGCACAGATTTGGTGGG      |
|             |                              | Oligo-dn | ATTATCAATTTCCACACTTTCAAC      |
| RP11        | GCAATCTGGGTGGAATGGTT         | Oligo-up | GTCCAGTGAGTATTGTCTAAGG        |
|             |                              | Oligo-dn | GAGGTCTCCAATTGTCTACC          |
| HIRA        | GTATTCTAGAATGCAGGGCA         | Oligo-up | GTGTGGAAGATAGATGAG            |
|             |                              | Oligo-dn | CTGCCATCACAAATTCTAGTC         |
| DNMT3B      | AGAGCCCCCCTCAAAGAGA          | Oligo-up | GGCTGTTTGTCTTGTGGC            |
|             |                              | Oligo-dn | AAGGCAGCTGGGATGAGTG           |
| EMX1-site2  | TGCCCTCCCTCCCTGGCCC          | Oligo-up | TGAGTGTGAGGCCCCAGT            |
|             |                              | Oligo-dn | CTGCTTCGTGGCAATGCC            |
| CDK6        | GTGAACAATTATCAAAATGG         | Oligo-up | AGACTTTAAGCCAGAGACAC          |
|             |                              | Oligo-dn | CTAGCCATGATGTGCTGC            |
| MSSK1-site1 | GACCCACGGCGGGGATCAGGG        | Oligo-up | GTGTTCAATGGGCGGTACCACG        |
|             |                              | Oligo-dn | CTTGCGCCTGCAATACCGAGAC        |
| TET2-site1  | TTGCTCTGCTTCTTCTCCA          | Oligo-up | ATCCAACCTCCCACCTCG            |
|             |                              | Oligo-dn | AGTGGAGACCTGGGCTGC            |
| TET2-site2  | CCTTTCTAACAAATCCTAAA         | Oligo-up | GCTGCTTTCGTAGAGAAGC           |
|             |                              | Oligo-dn | GACACTACAGGTTTGTCT            |
| MSSK1-site2 | CGTCGCCGATCTTCACAGGG         | Oligo-up | TGGGCCAGATGGTCAATGG           |
|             |                              | Oligo-dn | AGCCAGACGGTGGAGAAGT           |
| FANCF       | AAGTTCGCTAATCCCGGAAC         | Oligo-up | GGCTGCACAACCAGTGA             |
|             |                              | Oligo-dn | CCAGGCTCTCTTGGAGTGTCT         |
| EMX-sg1     | GCTCCATCACATCAACCGG          | Oligo-up | GTGAAGGTGTGGTCCAGAA           |
|             |                              | Oligo-dn | CTCGTGGGTTTGTGGTTG            |
| EMX-sg2     | GACATCGATGTCTCCCAT           | Oligo-up | GTGAAGGTGTGGTCCAGAA           |
|             |                              | Oligo-dn | CTCGTGGGTTTGTGGTTG            |
| TET2-site3  | AGATTCTGAATGAGCAGGAG         | Oligo-up | TCGGGGTAAGCCAAGAAAG           |
|             |                              | Oligo-dn | CTGTGCATGGTAATTAGCACTT        |
| ZWINT       | TGAAAACAAAACATACAATAG        | Oligo-up | CGAAAACAGAAAGTGGGAAAGAT       |
|             |                              | Oligo-dn | ACAGTGAGCTCATCTGACT           |
| HEK4-site2  | GTACACTTGTGCAACCTCAC         | Oligo-up | ATTTCTGTCAACCCACTACAGC        |
|             |                              | Oligo-dn | GGCACAAGAATAATAGACCCTGG       |
| VEGFA-site1 | ATGTTCTTGCTGTTGTTGTT         | Oligo-up | CAGTGGCTCACACCTAGT            |
|             |                              | Oligo-dn | CGTGAAATCAATTGTTTAGAGAGGA     |
| VISTA       | GAACACAAAGCATAGACTGC         | Oligo-up | GGCTGAGCTAACTGTGACAGCATGTG    |
|             |                              | Oligo-dn | CCCAAGTGAGAAGCCAGTGAATAC      |
| VEGFA-site2 | GACCCCTCCACCCCGCCTC          | Oligo-up | TTGGGATCCCGCAGCTGA            |
|             |                              | Oligo-dn | TCCGAAGCGAGAACAGCC            |
| CTLA        | CTCCCTCAAGCAGGCCCCGC         | Oligo-up | TTCCAGGGCAGCAGAAGAA           |
|             |                              | Oligo-dn | GCAGATGTAGTGTTCACAGG          |
| EMX1-site3  | GCTAACTTACTGTGTAACCC         | Oligo-up | AGATGGTTTGGACAGAGCTTCC        |
|             |                              | Oligo-dn | TACCTTAAAGGGAAGGGACTAGGG      |
| MYC-site    | CACGGCCGACCAGCTGGAGA         | Oligo-up | CCCTCCTACGTTGCGGTCA           |
|             |                              | Oligo-dn | CGAGAAGCCGCTCCACAT            |

**Table S2-2: Clone oligos and deep sequencing oligos of sgRNA-Chromatin environment**

| Name | sgRNA          | Target site sequence (5'-3') |          | Deep sequencing oligo (5'-3')           |
|------|----------------|------------------------------|----------|-----------------------------------------|
| A1   | RIOK2          | GGCCACATTCAC TTCCCCA         | Oligo-up | CGGCGGGTTCTTACCGC                       |
|      |                |                              | Oligo-dn | TATACTAAGACGCAGCGCGTGC                  |
| A2   | CAST           | ATCTACTTCTCCGGATTGTT         | Oligo-up | CACACACACACAGACCAATTTGTTTTTG            |
|      |                |                              | Oligo-dn | AGTTGTGCAACGAGAGAGCG                    |
| A3   | AFF1           | CTGCACTTCAGACGAGCCCG         | Oligo-up | TTGTGCTGTTGCTGGGCAGG                    |
|      |                |                              | Oligo-dn | AATCCTGATGGACATCCGGGC                   |
| A4   | MED28          | CAGTTCACGTTTCAGAAAAA         | Oligo-up | TTCAGGCAGCTCCAGGCGC                     |
|      |                |                              | Oligo-dn | CCCATTGTGAATTAGTTGCTCGGATCCC            |
| A5   | SLC11A1        | CCCATCTCTTCTCTCCTTGA         | Oligo-up | TTCTGGGGACCCAGCAGG                      |
|      |                |                              | Oligo-dn | TTGCCCAGGTACCCTCTGCA                    |
| A6   | RNF2           | GTCATCTTAGTCATTACCTG         | Oligo-up | ACGGAACTCAACCATTAAG                     |
|      |                |                              | Oligo-dn | AGTGTTAGCCAACATACAG                     |
| A7   | TET2-site1     | TTGCTCTGCTTCTTCTCCCA         | Oligo-up | ATCCCAACCTCCCACCTCG                     |
|      |                |                              | Oligo-dn | AGTGGAGACCTGGGCTGC                      |
| A8   | TET2-site2     | CCTTTCTAACAAATCCTAAA         | Oligo-up | GCTGCTTTCGTAGAGAAGC                     |
|      |                |                              | Oligo-dn | GACACTACAGGGTTTTGCT                     |
| A9   | VISTA          | GAACACAAAGCATAGACTGC         | Oligo-up | GGCTGAGCTAACTGTGACAGCATGTG              |
|      |                |                              | Oligo-dn | CCCAAGTGAGAAGCCAGTGAATAC                |
| IA1  | AC110614-1     | CCTTACAGACTAGAACAAAG         | Oligo-up | CTTACTGGGCAGTTTTTATTGTCTTTCAACAC        |
|      |                |                              | Oligo-dn | GACAAAAGTGTCTAGTCACCTATAAGAAAAATCCC     |
| IA2  | AK123816-II    | GAACTCTTATTCCTTGCTAG         | Oligo-up | TGAAGAAAGCTGTCCTAAACATCCGT              |
|      |                |                              | Oligo-dn | TACTGTAAAAGATAACAATACCAAGTGCTGG         |
| IA3  | AK123816-2-II1 | CCATTCTAACTGGTGTGAGA         | Oligo-up | CTTCAAGAACCATGTTATCATTTTTCCGCA          |
|      |                |                              | Oligo-dn | TCGCCACACTGACTTCCCA                     |
| IA4  | chr5-q21.1     | TTTAACTTCTCTCCTGAGTA         | Oligo-up | TCCATTGTTCAACTCATTCTGCAATTAAGC          |
|      |                |                              | Oligo-dn | AGTCATAATCTAAATTGTATTTCTGGCAGTAAGT      |
| IA5  | HCN1-site1     | CTTCACTGTCTTGCTAAATA         | Oligo-up | TCTGCTTGTTCATATTGGCAGTAACAAGGT          |
|      |                |                              | Oligo-dn | TATATTAGGAAACTACAAATTGTAACCTCTTATCCCTGA |
| IA6  | ch2-p12        | CTTTTCTCTGTAATATCACG         | Oligo-up | ACGGAACTCAACCATTAAG                     |
|      |                |                              | Oligo-dn | TAGTGCCTTTATAAAAAGAGGCTCCAGAGA          |
| IA7  | HCN1-site2     | AACCTCTTATCCCTGATGGT         | Oligo-up | TAAGATGCAGGACACAGTGTGCTAC               |
|      |                |                              | Oligo-dn | GGTTAAATGAGGTTCCCTGTCTGTCTCT            |
| IA8  | EMX1-site3     | GCTAACTTACTGTGTAACCC         | Oligo-up | AGATGGTTTGGACAGAGCTTCC                  |
|      |                |                              | Oligo-dn | CTACCTTAAAGGGAAGGGACTAGGG               |
| IA9  | HIRA           | GTATTCTAGAATGCAGGGCA         | Oligo-up | GTGTGGAAGATAGATGAG                      |
|      |                |                              | Oligo-dn | CTGCCATCACAATTCATGTC                    |

**Table S2-3: Clone oligos and deep sequencing oligos of sgRNA- Off-target site**

| sgRNA          | Target site sequence (5'-3') |          | Deep sequencing oligo (5'-3')        |
|----------------|------------------------------|----------|--------------------------------------|
| EMX1-site3-OT1 | GCTAACTTGCTGTGTGACCC         | Oligo-up | TATGGTGGTGGTTGAATCAATCTATATTATGCTA   |
|                |                              | Oligo-dn | ACATGTATTCTGCTCTTCTGTCTCAC           |
| EMX1-site3-OT2 | CCTAACTTACTGTGTAAGCC         | Oligo-up | CTGCAGGAGAAATAATCAGAGTTATAAAGTATACCT |
|                |                              | Oligo-dn | GAAGGTCAAGGGATAGAAGGTTGCA            |
| EMX1-site3-OT3 | GCAATCTTACTCTGTCACCC         | Oligo-up | CCTTGAGCCCAGGAGTAAGAGG               |
|                |                              | Oligo-dn | GCATGGCCTTTGCCCTGAT                  |
| EMX1-site3-OT4 | GCTTACTCACTGTGTATCCC         | Oligo-up | GGGAGTTAGGAATTTGGGTTCTGAAGG          |
|                |                              | Oligo-dn | GAGGCTTCATCTTAAATGGTTGTCAGGT         |
| EMX1-site3-OT5 | GCTGCCCTTGCTGTGTGACCC        | Oligo-up | ATGGAAGGAGCATTGGACAGAGAG             |
|                |                              | Oligo-dn | GAGAATAATAGGCTGTGGCTAGGGTATTT        |
| EMX1-site3-OT6 | GCTATTTAACTGTGTGACCC         | Oligo-up | CTCTATGGTGCATGGTTTGAGGATATTATCTT     |
|                |                              | Oligo-dn | GCTCAAAGGGATCTCAGGTTTCTTATCAC        |
| EMX1-site3-OT7 | GGGTCACACAGCAAGTTAG          | Oligo-up | AGGAAAGTCCACAGAACACAGAAATAGTTAAAG    |
|                |                              | Oligo-dn | TGCCATCATCAGACAACACTTTACAAAATG       |
| RP11-OT1       | GGAAGCTGGGTGACATGGTT         | Oligo-up | GTGGGAATTATGGGAGCTACAATTCAAGA        |
|                |                              | Oligo-dn | ACTTTGTATTGGTCGAAAGAAGGAAC           |
| RP11-OT2       | GCAATCGGGCTGGAATCTTT         | Oligo-up | AGAGATGGCCTCCAGATGTC                 |
|                |                              | Oligo-dn | GGCTTGTAGGAACGCTCAGTGA               |
| RP11-OT3       | GCAGTCACTGTGGAATGGTT         | Oligo-up | TGCAAGCCCAAACAACAATATACCATTTC        |
|                |                              | Oligo-dn | CCTGTGTTTAGCTTCTTATATCGCAGTTCT       |
| RP11-OT4       | GCTAACTGGGTGGTATGGTT         | Oligo-up | CCCGTGAGTTAATGGTCTCCCTC              |
|                |                              | Oligo-dn | CACCATAGTTGGCTCCTTGCGG               |
| RP11-OT5       | GCAACCTGGGTGGACTGTTT         | Oligo-up | AGGGACAAGAGGATTGAGGTCAC              |
|                |                              | Oligo-dn | GGAGTTTGGTGCCTGATACCATTG             |
| RP11-OT6       | GCAATCTGGGGTATATGGTT         | Oligo-up | AGCACAACTCTGCAAGCTACTC               |
|                |                              | Oligo-dn | ACAGCTTACACGGACTTCTCCTTT             |
| RP11-OT7       | GCAATCGGGATGGAATTGTG         | Oligo-up | TGGCAGGCAGATCACAAACAG                |
|                |                              | Oligo-dn | CCTCAGTGACAAGTGCATACCTCC             |
| RP11-OT8       | GCAATTTGTGTGGAATGGTT         | Oligo-up | TCTGAACTCTTTGCACTTTGGAGTGAC          |
|                |                              | Oligo-dn | CAAATACCTGTGGTTTGGCCC                |
| HEK2           | GAACACAAAGCATAGACTGC         | Oligo-up | GGCTGAGCTAACTGTGACAGCATGTG           |
|                |                              | Oligo-dn | CCCAAGTGAGAAGCCAGTGAATAC             |
| HEK2-OT1       | GAACACAATGCATAGATTGC         | Oligo-up | GTGTGGAGAGTGAGTAAGCCA                |
|                |                              | Oligo-dn | ACGGTAGGATGATTTTAGGCA                |
| HEK2-OT2       | AAACATAAAGCATAGACTGC         | Oligo-up | CACAAAGCAGTGTAGCTCAGG                |
|                |                              | Oligo-dn | TTTTTGGTACTCGAGTGTTATTTCAG           |
| HEK3           | GGCCAGACTGAGCACGTGA          | Oligo-up | GGAAACGCCCATGCAATTAGTC               |
|                |                              | Oligo-dn | CTTGTC AACAGTATCCCGGTG               |
| HEK3-OT1       | CACCCAGACTGAGCACGTGC         | Oligo-up | TCCCCTGTTGACCTGGAGAA                 |
|                |                              | Oligo-dn | CACTGTACTTGCCCTGACCA                 |
| HEK3-OT2       | GACACAGACTGGGCACGTGA         | Oligo-up | TTGGTGTGACAGGGAGCAA                  |
|                |                              | Oligo-dn | CTGAGATGTGGGCAGAAAGGG                |
| HEK3-OT3       | AGCTCAGACTGAGCAAGTGA         | Oligo-up | TGAGAGGGAACAGAAGGGCT                 |
|                |                              | Oligo-dn | GTCCAAAGGCCAAGAACCT                  |
| HEK3-OT4       | AGACCAGACTGAGCAAGAGA         | Oligo-up | CCTAGCACTTTGGAAGGTCG                 |
|                |                              | Oligo-dn | GCTCATCTTAATCTGCTCAGCC               |
| HEK4           | GGCACTGCGGCTGGAGGTGG         | Oligo-up | AAGGAAGGGAGGAAGGGC                   |
|                |                              | Oligo-dn | ACACACACACAGGCTG                     |
| HEK4-OT1       | TGCACTGCGGCCGGAGGAGG         | Oligo-up | GGCATGGCTTCTGAGACTCA                 |
|                |                              | Oligo-dn | CCCTTGCACTCCCTGTCTTT                 |
| HEK4-OT2       | GGCTCTGCGGCTGGAGGGGG         | Oligo-up | TTTGGCAATGGAGGCATTGG                 |
|                |                              | Oligo-dn | GAAGAGGCTGCCCATGAGAG                 |
| HEK4-OT3       | GGCATCACGGCTGGAGGTGG         | Oligo-up | TTCCACCAGA ACTCAGCCC                 |
|                |                              | Oligo-dn | CCTCGGTTCTCCACAACAC                  |



**Supplementary Table S3: PCR oligo of genomic sites from different chromatin environments**

| Gene           |          | Clone oligo (5'-3')                    |
|----------------|----------|----------------------------------------|
| A1             | Oligo-up | CGGCGGGTTTCTTACCGC                     |
|                | Oligo-dn | TATACTAAGACGCAGCGCGTGC                 |
| A6             | Oligo-up | ACGGAACTCAACCATTAAG                    |
|                | Oligo-dn | AGTGTTAGCCAACATACAG                    |
| IA2            | Oligo-up | TGAAGAAAGCTGTCCTAACATCCGT              |
|                | Oligo-dn | TACTGTAAAAGATAACAATACCAAGTGCTGG        |
| IA3            | Oligo-up | CTTCAAGAACCATGTTATCATTTTCCGCA          |
|                | Oligo-dn | TCGCCACACTGACTTCCCA                    |
| EMX1-site3     | Oligo-up | AGATGGTTTGGACAGAGCTTCC                 |
|                | Oligo-dn | CTACCTTAAAGGGAAGGGACTAGGG              |
| RP11           | Oligo-up | GTCCAGTGAGTATTGTCTAAGG                 |
|                | Oligo-dn | GAGGTCTCCAATTGCTACC                    |
| EMX1-site3-OT1 | Oligo-up | TATGGTGGTGGTTGAATCAATCTATATTATGCTA     |
|                | Oligo-dn | ACATGTATTCTGCTCTTCTGTCCTCAC            |
| EMX1-site3-OT2 | Oligo-up | CTGCAGGAGAAATAATCAGAGTTATAAAGTATATACCT |
|                | Oligo-dn | GAAGGTCAAGGGATAGAAGGTTGCA              |
| EMX1-site3-OT4 | Oligo-up | CTCTATGGTGCATGGTTTGAGGATATTATCTT       |
|                | Oligo-dn | GCTCAAAGGGATCTCAGGTTTCTTATCAC          |
| RP11-OT2       | Oligo-up | AGAGATGGCCTCCCAGATGTC                  |
|                | Oligo-dn | GGCTTGTAGGAACGCTCAGTGA                 |
| RP11-OT5       | Oligo-up | AGGGACAAGAGGATTGAGGTCAC                |
|                | Oligo-dn | GGAGTTTGGTGCCTGATACCATTG               |
| RP11-OT6       | Oligo-up | AGCACAACTCTGCAAGCTACTC                 |
|                | Oligo-dn | ACAGCTTACACGGACTTCTCCTTT               |
| GAPDH          | Oligo-up | TCTGGTGGCTGGCTCAGAA                    |
|                | Oligo-dn | TGGTGGTCCAGGGGCTTAC                    |
